# Supplementary material for: Cytotoxicity of Nine Medicinal Plants from San Basilio de Palenque (Colombia) on HepG2 Cells
Source: MDPI journal article supplement (doi:10.3390/plants12142686), 2023-07-19
Supplement: s1 [file s1]

**Table S1.** Code, common name, scientific name, medicinal use, part of the plant used of medicinal plants used by the knowers of San Basilio de Palenque, Bolívar, Colombia.

| Code | Common name            | Scientific name                                                       | Family           | Medicinal use                                       | Plant part used       |
|------|------------------------|-----------------------------------------------------------------------|------------------|-----------------------------------------------------|-----------------------|
| 001  | Capitana               | <i>Aristolochia odoratissima</i> L.                                   | Aristolochiaceae | Anti-inflammatory and animals bite remedy           | Stem                  |
| 002  | Salvia                 | <i>Croton</i> sp.                                                     | Euphorbiaceae    | Anti-inflammatory and flu                           | Stem and leaves       |
| 003  | Tua tua                | <i>Jatropha gossypifolia</i> L.                                       | Euphorbiaceae    | Anti-inflamatorio, cholesterol, diabetes and fungus | Stem and leaves       |
| 004  | Santa María            | <i>Piper peltatum</i> L.                                              | Piperaceae       | Anti-inflammatory                                   | Stem and flower       |
| 005  | Malva                  | <i>Malachra alceifolia</i> Jacq.                                      | Malvaceae        | Anti-inflammatory and cystitis                      | Stem and leaves       |
| 006  | Quina                  | <i>Picramnia latifolia</i> Tul.                                       | Picramniaceae    | Anti-inflammatory, spasms, pain, and fever          | Stem                  |
| 007  | Selvatana              | <i>Verbesina turbacensis</i> Kunth                                    | Asteraceae       | Anti-inflammatory                                   | Stem                  |
| 008  | Higuereta              | <i>Ricinus communis</i> L.                                            | Euphorbiaceae    | Anti-inflammatory                                   | Stem and leaves       |
| 009  | Cincollagas            | <i>Passiflora</i> sp.                                                 | Passifloraceae   | Anti-inflammatory, fever and flu                    | Stem                  |
| 010  | Calilla de perro largo | <i>Desmodium incanum</i> (Sw.) DC.                                    | Fabaceae         | Anti-inflammatory                                   | Stem and leaves       |
| 011  | Contra gabilana        | <i>Schultesia lisianthoides</i> (Griseb.) Benth. & Hook. f. ex Hemsl. | Gentianaceae     | Anti-inflammatory and parasites                     | root, stem and leaves |
| 012  | Uña gato               | <i>Dolichandra unguis-cati</i> (L.) L.G. Lohmann                      | Bignoniaceae     | Anti-inflammatory                                   | --                    |
| 013  | Caga de pajarito       | <i>Phoradendron</i> cf. <i>quadrangulare</i> (Kunth) Griseb.          | Santalaceae      | Anti-inflammatory, diabetes and poor circulation.   | Stem                  |
| 014  | Albaca silvestre       | <i>Hyptis suaveolens</i> (L.) Poit.                                   | Lamiaceae        | Anti-inflammatory                                   | Stem and leaves       |
| 015  | Caña de mico           | <i>Costus</i> cf. <i>Spiralis</i> (jacq.) Roscoe                      | Costaceae        | Anti-inflammatory and kidney diseases               | Stem                  |
| 016  | Malambo                | <i>Croton malambo</i> H.Karst.                                        | Euphorbiaceae    | Snake bite and pain                                 | leaves and cortex     |

|     |                                      |                                                            |                |                                             |                            |
|-----|--------------------------------------|------------------------------------------------------------|----------------|---------------------------------------------|----------------------------|
| 017 | Lengua suegra                        | <i>Kalanchoe pinnatifida</i><br>Raym.-Hamet &<br>H.Perrier | Crassulaceae   | Pains                                       | leaves                     |
| 018 | Colicenci                            | <i>Cordia</i> sp.                                          | Boraginaceae   | Flu, headache and suffocation               | leaves                     |
| 019 | Cruzeta                              | <i>Quassia</i> sp.                                         | Simaroubaceae  | Flu, fever and body aches                   | stem, cortex and<br>leaves |
| 020 | Malamadre                            | <i>Kalanchoe</i> sp.                                       | Crassulaceae   | Insect bites and snake bites                | Stem                       |
| 021 | Coquito                              | <i>Cyperus luzulae</i> (L.)<br>Retz.                       | Cyperaceae     | Pain and hemorrhoids                        | Stem and leaves            |
| 022 | Santa María                          | <i>Baccharis trinervis</i><br>Pers.                        | Asteraceae     | blows and pain                              | Stem and leaves            |
| 023 | Totumo                               | <i>Crescentia cujete</i> L.                                | Bignoniaceae   | flu and phlegm (mucus)                      | Fruit                      |
| 024 | Matarraton                           | <i>Gliricidia sepium</i><br>(Jacq) Kunth ex<br>Walp.       | Fabaceae       | Fever, allergies in the body and pains      | leaves                     |
| 025 | Anamú                                | <i>Petiveria alliacea</i> L.                               | Phytolaccaceae | Fever                                       | leaves and stems           |
| 026 | Pringamoza<br>blanca                 | <i>Cnidoscolus urens</i> (L.)                              | Euphorbiaceae  | Mucus, stones, and cysts in the vagina      | Root                       |
| 027 | Bejuco cadena                        | <i>Bauhinia glabra</i> Jacq.                               | Fabaceae       | Phlegm, mucus and blood pressure            | Root                       |
| 028 | Escobilla menuda                     | <i>Scoparia dulcis</i> L.                                  | Plantaginaceae | Diarrhea, vomiting, toothache and parasites | Root, Stem and leaves      |
| 029 | heliotropo indio,<br>cola de alacrán | <i>Heliotropium indicum</i><br>L.                          | Boraginaceae   | Vomiting, tummy ache, parasites and phlegm  | Root, Stem and leaves      |
| 030 | Bicho, palo<br>zorrito               | <i>Senna obtusifolia</i> (L.)<br>H.S. Irwin & Barneby      | Fabaceae       | Vomiting and diarrhea                       | Root                       |
| 031 | Moringa                              | <i>Moringa oleifera</i> Lam.                               | Moringaceae    | phlegm (mucus)                              | Fruit, leaves and seed     |
| 032 | Chocolatillo                         | <i>Chomelia spinosa</i> Jacq.                              | Rubiaceae      | Flu and fever                               | Stem and leaves            |
| 033 | Ariza                                | <i>Brownea ariza</i> Benth.                                | Fabaceae       | Hemorrhage                                  | Cortex and flower          |
| 034 | Julio                                | <i>Ichthyothere</i> sp.                                    | Asteraceae     | wounds and bleeding                         | leaves                     |
| 035 | Guarumo                              | <i>Cecropia peltata</i> L.                                 | Urticaceae     | Prostate pain and spasm                     | leaves                     |
| 036 | La leona, lengua<br>de culebra       | <i>Barleria lupulina</i><br>Lindl.                         | Acanthaceae    | muscle aches                                | leaves                     |
| 037 | Pata de vaca                         | <i>Bauhinia pauletia</i> Pers.                             | Fabaceae       | Pain, calculus and prostate                 | Stem                       |

|     |                                |                                                      |                  |                                                 |                  |
|-----|--------------------------------|------------------------------------------------------|------------------|-------------------------------------------------|------------------|
| 038 | Papaya                         | <i>Carica papaya</i> L.                              | Caricaceae       | Sinusitis                                       | Flower and fruit |
| 039 | Contrayerba                    | <i>Dorstenia contrajerva</i> L.                      | Moraceae         | Insect bite                                     | Root and flower  |
| 040 | Jagua                          | <i>Senna reticulata</i> (Willd.) H.S.Irwin & Barneby | Fabaceae         | Purgative                                       | leaves           |
| 041 | Toronjil, albahaca lima        | <i>Ocimum americanum</i> L.                          | Lamiaceae        | Flu                                             | Stem and leaves  |
| 042 | Matandrea                      | <i>Renealmia</i> sp.                                 | Zingiberaceae    | Fever                                           | leaves           |
| 043 | Coralillo, lágrimas de Cristo  | <i>Russelia equisetiformis</i> Schltdl. & Cham.      | Scrophulariaceae | Pains                                           | Stem and leaves  |
| 044 | Nim, Neem, Paraiso de la India | <i>Azadirachta indica</i> A.Juss.                    | Meliaceae        | Control sugar levels                            | Stem and leaves  |
| 045 | Mango de Puerco                | <i>Mangifera indica</i> L.                           | Anacardiaceae    | Pains                                           | leaves           |
| 046 | Orégano                        | <i>Origanum vulgare</i> L.                           | Lamiaceae        | Ear pain and flu                                | leaves           |
| 047 | Pítamo real                    | <i>Euphorbia tithymaloides</i> L.                    | Euphorbiaceae    | toothache and earache                           | leaves           |
| 048 | Guanábana                      | <i>Annona muricata</i> L.                            | Annonaceae       | control cancer                                  | leaves           |
| 049 | Manito de Dios                 | <i>Kalanchoe pinnata</i> (Lam.) Pers.                | Crassulaceae     | Pain and insect bites                           | leaves           |
| 050 | Uvita                          | <i>Cordia dentata</i> Poir.                          | Boraginaceae     | Allergy, conjunctivitis and toothache           | Flower and fruit |
| 051 | Balsamina                      | <i>Momordica charantia</i> L.                        | Cucurbitaceae    | allergies and diabetes                          | leaves           |
| 052 | Bejuco alambrito               | <i>Funastrum</i> sp.                                 | Apocynaceae      | Allergy and snake bite                          | Stem and leaves  |
| 053 | verdolaga, Joyweed             | <i>Alternanthera</i> sp.                             | Amaranthaceae    | Gastritis                                       | Stem and leaves  |
| 054 | Cierrateputa                   | <i>Mimosa pudica</i> L.                              | Fabaceae         | Snake bite, poor blood circulation and diabetes | Root and stem    |
| 055 | Menta                          | <i>Mentha x piperita</i> L.                          | Lamiaceae        | gastritis and phlegm                            | Stem and leaves  |
| 056 | Singa mochila                  | <i>Justicia secunda</i> Vahl                         | Acanthaceae      | kidneys and cholesterol                         | leaves           |
| 057 | Cadillo de perro bolsita       | <i>Priva lappulacea</i> (L.) Pers.                   | Verbenaceae      | Pain, cirrhosis and open wounds                 | Stem and leaves  |

|     |                     |                                              |                  |                                               |                          |
|-----|---------------------|----------------------------------------------|------------------|-----------------------------------------------|--------------------------|
| 058 | Azahar de la india  | <i>Murraya paniculata</i> (L.) Jack          | Rutaceae         | Toothache and fever                           | leaves, flower and fruit |
| 059 | Acetaminofen, boldo | <i>Plectranthus neochilus</i> Schltr         | Lamiaceae        | Headache, fever, gastritis and blood pressure | Root, stem y leaves      |
| 060 | Culantro            | <i>Eryngium foetidum</i> L.                  | Apiaceae         | stomach constipation                          | Root, stem y leaves      |
| 061 | Guandú              | <i>Cajanus cajan</i> (L.) Huth               | Fabaceae         | fever and mucus                               | Root, stem y leaves      |
| 062 | Matimba             | <i>Annona purpurea</i> Moc. & Sessé ex Dunal | Annonaceae       | Fever and headache                            | leaves and fruit         |
| 063 | Flor de muerto      | <i>Caesalpinia pulcherrima</i> (L.) Sw.      | Fabaceae         | Phlegm and chronic flu                        | Flower                   |
| 064 | Aguacate            | <i>Persea americana</i> Mill.                | Lauraceae        | Fertility                                     | Stem, leaves and fruit   |
| 065 | Campano             | <i>Samanea saman</i> (Jacq.) Merr.           | Fabaceae         | body aches and flu                            | Cortex                   |
| 066 | Olivo               | <i>Quadrella odoratissima</i> (Jacq.) Hutch. | Capparaceae      | fever and flu                                 | Stem and leaves          |
| 067 | Ahuyama             | <i>Cucurbita maxima</i> Duchesne             | Cucurbitaceae    | Body pain                                     | Stem and leaves          |
| 068 | Toporopo            | <i>Physalis angulata</i> L.                  | Solanaceae       | Gastritis                                     | Root, Stem and leaves    |
| 069 | Jobo de cerca       | <i>Spondias mombin</i> L.                    | Anacardiaceae    | eye discomfort                                | exudate                  |
| 070 | Guamacho            | <i>Pereskia guamacho</i> F.A.C.Weber         | Cactaceae        | chronic flu                                   | Stem and leaves          |
| 071 | Flor de Jamaica     | <i>Hibiscus sabdariffa</i> L.                | Malvaceae        | Headache                                      | Root and stem            |
| 072 | Almendra            | <i>Terminalia catappa</i> L.                 | Combretaceae     | Muscle pain                                   | stem and leaves          |
| 073 | Cañandonga          | <i>Cassia grandis</i> L.f.                   | Fabaceae         | Anemia and platelets                          | Fruit                    |
| 074 | Sábila              | <i>Aloe vera</i> (L.) Burm.f.                | Xanthorrhoeaceae | Blows and flu                                 | leaves                   |
| 075 | Bleo de puerco      | <i>Amaranthus spinosus</i> L.                | Amaranthaceae    | Fever                                         | root, stem and leaves    |
| 076 | Cola babilla        | <i>Epiphyllum</i> sp.                        | Cactaceae        | expel mucus                                   | stem                     |
| 077 | Hierbamora          | <i>Solanum americanum</i> Mill               | Solanaceae       | allergies                                     | root, stem and leaves    |
| 078 | Raíz de murciélago  | <i>Chiococca</i> sp.                         | Rubiaceae        | allergies                                     | Tuber                    |
| 079 | Ceiba blanca        | <i>Hura crepitans</i> L.                     | Euphorbiaceae    | wounds                                        | Seed and exudates        |

|     |              |                                                                   |                |                                   |                   |
|-----|--------------|-------------------------------------------------------------------|----------------|-----------------------------------|-------------------|
| 080 | Milagrosa    | <i>Verbesina pterophora</i><br>S.F.Blake                          | Asteraceae     | poor blood circulation            | stem and leaves   |
| 081 | Caracolí     | <i>Anacardium excelsum</i><br>(Bertero ex Kunth)<br>Skeels)       | Anacardiaceae  | Anemia and fertility              | Fruit             |
| 082 | Caraña       | <i>Bursera graveolens</i><br>(Kunth) Triana &<br>Planch.          | Burseraceae    | Fever, flu and headache           | bark and leaves   |
| 083 | Cedro        | <i>Cedrela odorata</i> L.                                         | Meliaceae      | cough and body pain               | leaves            |
| 084 | Achiote      | <i>Bixa orellana</i> L.                                           | Bixaceae       | pain and burns                    | Leaves and fruit  |
| 085 | Mora blanca  | <i>Maclura tinctoria</i> (L.)<br>D. Don ex G. Don                 | Moraceae       | Parasites                         | bark and exudates |
| 086 | Gusanero     | <i>Astronium graveolens</i><br>Jacq                               | Anacardiaceae  | fever and flu                     | leaves            |
| 087 | Dividivi     | <i>Caesalpinia coriaria</i><br>(Jacq.) Willd.                     | Fabaceae       | Wounds and sores on the skin      | seed              |
| 088 | Plátano      | <i>Musa</i> sp.                                                   | Musaceae       | ulcer                             | stem              |
| 089 | Maíz         | <i>Zea mays</i> L.                                                | Poaceae        | kidneys and colon                 | flower            |
| 090 | Roble        | <i>Tabebuia rosea</i><br>(Bertol.) Bertero ex<br>A.DC.            | Bignoniaceae   | Headache, sinusitis and fever     | leaves            |
| 091 | Bejuco batea | <i>Dolichandra</i><br><i>quadri-valvis</i> (Jacq.)<br>L.G.Lohmann | Bignoniaceae   | Sinusitis                         | leaves and seed   |
| 092 | llantén      | <i>Plantago major</i> L.                                          | Plantaginaceae | pains                             | leaves            |
| 093 | Cotorrera    | <i>Ocimum</i><br><i>campechianum</i> Mill.                        | Lamiaceae      | Fever, blurred vision and allergy | Flower            |
| 094 | Hombre solo  | <i>Acacia collinsii</i> Saff.                                     | Fabaceae       | pain and allergy                  | Stem and leaves   |
| 095 | Cajón        | <i>Hibiscus rosa-sinensis</i><br>L.                               | Malvaceae      | poor blood circulation            | leaves, stem      |
| 096 | Algarrobo    | <i>Hymenaea courbaril</i> L.                                      | Fabaceae       | Hemoglobin                        | Frut              |
| 097 | Cigarrón     | <i>Senna fruticosa</i> (Mill.)<br>H.S.Irwin & Barneby.            | Fabaceae       | Headache                          | Stem and leaves   |

|     |          |                              |               |                   |                        |
|-----|----------|------------------------------|---------------|-------------------|------------------------|
| 098 | Katriana | <i>Hyptis capitata</i> Jacq. | Lamiaceae     | skin spots        | Root, stem, and leaves |
| 099 | Disulina | <i>Chamaecostus</i> sp.      | Costaceae     | Diabetes and pain | leaves                 |
| 100 | Sangrina | <i>Curcuma longa</i> L.      | Zingiberaceae | bleeding and pain | leaves and tuber       |
